# Supplementary material
Source: publisher site journal article supplement (https://www.spandidos-publications.com/6555/downloadSupplementary)

Figure S1. Extent of the lesions and the degree of metabolism were assessed using PET/CT. (A) At pre-therapy, diffuse bone marrow metabolic activity was observed with multiple high metabolic lymph nodes above and below the diaphragm, along with splenomegaly exhibiting increased metabolic activity; (B) at post-therapy, bone marrow metabolism decreased, the volume of high metabolic lymph nodes above and below the original diaphragm significantly decreased or did not show, the volume of spleen decreased and metabolism decreased.

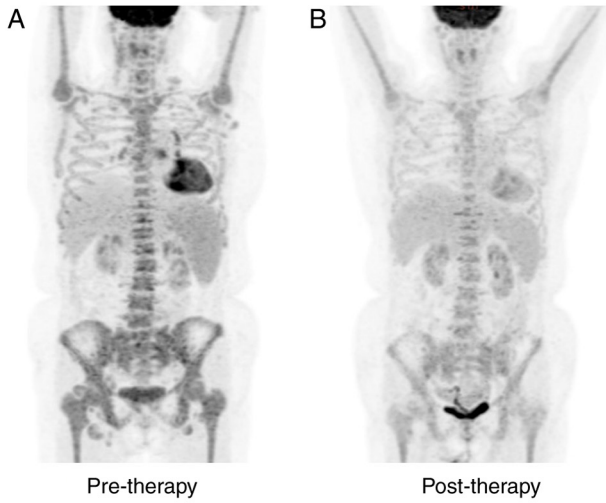

Supplement: Supplementary file 1 [file downloadSupplementary]
